crystal structures of RNA-bound human IFIT1 dimers

1 **A conserved homo-dimerization interface in human IFIT1 provides**  
2 **insights into IFIT interactome assembly**

3 **Yazan M. Abbas<sup>1</sup>, Saúl Martínez-Montero<sup>2</sup>, Regina Cencic<sup>3</sup>, Jerry Pelletier<sup>3</sup>, Peter D.**  
4 **Pawelek<sup>4,5</sup>, Masad J. Damha<sup>2</sup>, & Bhushan Nagar<sup>1,5</sup>**

5 <sup>1</sup>Department of Biochemistry, McGill University, 3649 Promenade Sir William Osler, Montreal,  
6 Quebec H3G 0B1, Canada

7 <sup>2</sup>Department of Chemistry, McGill University, 801 Sherbrooke Street West, Montreal, Quebec  
8 H3A 0B8, Canada

9 <sup>3</sup>Departments of Biochemistry and Oncology and The Rosalind and Morris Goodman Cancer  
10 Research Center, McGill University, Montréal, Québec H3G 1Y6, Canada

11 <sup>4</sup>Department of Chemistry, Concordia University, 7141 Sherbrooke Street West, Montréal,  
12 Québec H4B 1R6, Canada

13 <sup>5</sup>Groupe de Recherche Axé sur la Structure des Protéines (GRASP)

14 Running title: Crystal structures of RNA-bound human IFIT1 dimers

15 To whom correspondence should be addressed: Dr. Bhushan Nagar, Room 464, 3649 promenade  
16 Sir-William-Osler, Montréal, Québec, H3G 0B1, Canada. Telephone: 514-398-7272. Fax: 514-  
17 398-2983. E- mail: [bhushan.nagar@mcgill.ca](mailto:bhushan.nagar@mcgill.ca)

18 **Keywords** IFIT1, crystal structure, mRNA, cap-binding protein, eukaryotic translation initiation,  
19 TPR, triphosphate RNA, innate immunity, antiviral

20

## crystal structures of RNA-bound human IFIT1 dimers

### 21 **Abstract**

22 The Interferon-Induced Proteins with Tetratricopeptide Repeats (IFITs) are a group of potentially  
23 expressed Interferon Stimulated Genes that mediate antiviral innate immunity. Previous studies  
24 have revealed that most IFITs partake in higher order structures, potentially as part of an ‘IFIT  
25 interactome’ that results in viral inhibition. Recent crystal structures of a mutated, monomeric form  
26 of IFIT1 revealed the molecular basis of how it recognizes non-self, capped viral mRNAs to  
27 selectively inhibit their translation. However, wild-type IFIT1 forms dimers in solution and the  
28 role of dimerization was not examined in detail. Here we present a structural and biochemical  
29 analysis of wild-type IFIT1 in complex with capped and uncapped RNA. Wild-type IFIT1 forms  
30 an antiparallel, elongated dimer that is in stark contrast to the domain-swapped, parallel dimer  
31 found in IFIT2. Dimerization takes place through a small, C-terminal interface that is  
32 evolutionarily conserved in IFIT1 and IFIT1B proteins. The interface is modular and can be grafted  
33 onto IFIT5, which is natively monomeric, to induce dimerization. Mutational analysis of this  
34 interface showed that homo-dimerization is not required for full RNA binding or translational  
35 inhibition by IFIT1. Sedimentation velocity analytical ultracentrifugation measurements  
36 demonstrated a reversible monomer-dimer equilibrium, suggesting that dimerization is of low  
37 affinity and could play a role under physiological concentrations, possibly in regulating IFIT  
38 interactome assembly. Finally, conformational changes in IFIT1 that occur upon RNA binding  
39 provide insight into how RNA enters its binding site in solution.

### 40 **Introduction**

41 Interferon (IFN) stimulated genes (ISGs) are a broad class of genes whose expression is triggered  
42 downstream of virally activated signaling pathways (1). They number in the hundreds and  
43 altogether mediate diverse antiviral effects to promote an antiviral state within infected and  
44 uninfected cells. The IFN-induced proteins with tetratricopeptide repeats (IFITs) are among the

## crystal structures of RNA-bound human IFIT1 dimers

45 most potently induced ISGs (2). They are conserved throughout vertebrate evolution, and in  
46 humans and most mammals, consist of 5 paralogues: IFIT1, IFIT1B, IFIT2, IFIT3, and IFIT5 (3).  
47 IFITs are cytosolic proteins composed of multiple tandem copies of the tetratricopeptide repeat  
48 (TPR), a helix-turn-helix motif with the propensity to assemble into super-helical arrays (4).  
49 Crystal structures of several IFITs revealed that their TPRs coalesce into three small, super-helical  
50 subdomains that come together to form clamp-shaped structures (5-9). TPRs generally mediate  
51 protein-protein interactions (10), through which IFITs were previously implicated in modulating  
52 several biological processes including cell proliferation (11, 12), migration (13, 14), apoptosis  
53 (15), and cytokine signaling (16-18), although the molecular details of these are poorly defined.

54 However, more recently it was discovered that the primary mode of IFIT action is to deter  
55 viral replication through direct interaction with the 5' ends of viral RNAs (19). This role is best  
56 characterized in the ability of IFIT1 and IFIT1B to compete with the eukaryotic initiation factor  
57 4F (eIF4F) for binding to the *N*<sup>7</sup>-methylguanosine triphosphate (m<sup>7</sup>Gppp-) cap and cap-proximal  
58 nucleotides at the 5' end of viral mRNAs (6, 20-23). In doing so, IFIT1 and IFIT1B inhibit viral  
59 mRNA translation, limiting viral protein production. Endogenous mRNA is protected from IFIT1  
60 and IFIT1B translational inhibition through 'self' markers such as ribose 2'-O methylation on the  
61 first and sometimes second cap proximal nucleotides (N1 and N2, where N is any nucleotide),  
62 which interfere with IFIT1 and IFIT1B binding (6, 20-22, 24, 25). Thus, IFITs play a critical role  
63 in antiviral innate immunity by discerning self from non-self. As such, in an attempt to evade IFIT1  
64 and IFIT1B activity, many viruses have acquired the means to produce mRNA displaying 2'-O  
65 methylation at N1 (26).

66 IFIT proteins also target other RNAs as part of their antiviral program. IFIT1 and IFIT5  
67 can recognize uncapped 5' triphosphate RNA (PPP-RNA) to interfere with the replication of some  
68 negative-sense single-stranded RNA viruses (5, 19), and IFIT2 has been shown to interact with  
69 AU-rich RNA (8). Conversely, IFIT3 is incapable of binding RNA on its own (5, 19). Thus, by

## crystal structures of RNA-bound human IFIT1 dimers

70 encoding different RNA binding properties and targeting different virus-derived RNAs, IFIT  
71 proteins are thought to mediate non-redundant antiviral activities, which is supported by the  
72 distinct and context-dependent induction pattern for each IFIT gene (2, 27). However, the  
73 expression of multiple IFITs simultaneously in many cell types, and the recent discovery of an  
74 IFN-dependent IFIT ‘interactome’ made up of IFIT1, IFIT2, IFIT3, and other host RNA-binding  
75 factors suggested cooperation amongst the different IFITs resulting in synergistic or  
76 complementary activities (19). At the core of this interactome, IFIT proteins interact directly with  
77 each other to form homo- and hetero-oligomers (19), but the nature of these interactions and how  
78 they regulate interactome assembly is not clear. Furthermore, how these interactions impact IFIT-  
79 RNA binding is not known.

80         Crystal structures of a mutated form of full-length IFIT1 with capped and uncapped RNA  
81 showed that it engages the 5’ end of only single-stranded RNA through a narrow, positively-  
82 charged RNA-binding tunnel at the center of the protein (6). The crystal structure of IFIT5 in  
83 complex with PPP-RNA showed a similar RNA-binding tunnel (5), which recognizes only  
84 uncapped RNA due to protein residues at one end of the tunnel blocking any progression beyond  
85 the PPP moiety (5, 6). Notably, biochemical and structural analyses of IFIT5 revealed that it exists  
86 exclusively in a monomeric state in solution that undergoes a conformational change upon RNA  
87 binding (5). Prior to RNA binding, IFIT5 appears to exist in a more open, discrete conformation  
88 in solution that compacts and wraps itself around the incoming RNA. Two extended, non-TPR  $\alpha$ -  
89 helices,  $\alpha$ 15 and  $\alpha$ 16, form a pivot region in IFIT5 that regulate the closure of the protein around  
90 the RNA. On the other hand, the crystal structure of RNA-free IFIT2 showed that it formed parallel  
91 domain-swapped dimers mediated by the exchange of three  $\alpha$ -helices ( $\alpha$ 7- $\alpha$ 9) from its second  
92 subdomain, resulting in two adjacent RNA-binding channels with relatively flexible C-terminal  
93 regions (8). The crystal structures of an N-terminal fragment of IFIT1 and RNA-bound IFIT1

## crystal structures of RNA-bound human IFIT1 dimers

94 showed no evidence for domain swapping and therefore how IFIT1 forms higher order structures  
95 and the nature of RNA-dependent conformational changes in IFIT1 are as yet unclear (5, 6).

96 We report here crystal structures of wild-type, human IFIT1 bound to capped and uncapped  
97 RNAs. The structures show that IFIT1 forms an antiparallel, end-to-end, S-shaped dimer using its  
98 extreme C-terminus to form a pseudo-continuous TPR super-helix, in stark contrast to the globular,  
99 domain-swapped, parallel dimer of IFIT2. Biophysical and mutational analysis confirm the  
100 presence of IFIT1 dimers in solution, and combined with functional assays, suggest that homo-  
101 dimerization is not required for full RNA binding and translational inhibition. Finally, comparison  
102 of the different RNA-bound forms of wild-type IFIT1, complemented with limited proteolysis,  
103 suggests a role for the C-terminal subdomain and an mRNA ‘cap-binding loop’ in mediating  
104 conformational changes that have implications for its antiviral activity. Our work uncovers a novel  
105 dimerization mechanism within the IFIT family and suggests a model for mRNA binding in  
106 solution.

## 107 **Results**

### 108 **IFIT1 forms dimers in solution**

109 IFIT1 has been reported to oligomerize and bind RNA with positive cooperativity (22), but the  
110 stoichiometry and mechanism of oligomerization are unknown. Therefore, we first wanted to  
111 validate the IFIT1 molecular weight (MW) in solution by subjecting it to multi-angle light  
112 scattering with inline size-exclusion chromatography (SEC-MALS, **Fig. 1A**). IFIT1 was injected  
113 into SEC-MALS at 180  $\mu$ M (10 mg/ml), and the protein migrated predominantly as a single peak  
114 with an estimated MW of 101.4 kDa, corresponding to an IFIT1 dimer (expected dimer MW 111  
115 kDa). Interestingly, the elution profiles consistently displayed a non-symmetric Gaussian shape  
116 with a tail on the low MW side, suggesting that the dimeric state may be in a dynamic equilibrium.

117 To better understand the potential dynamic nature of dimerization in solution, we turned to  
118 sedimentation velocity analytical ultracentrifugation (AUC, **Fig. 1B** and **Table S1**), performed at

## crystal structures of RNA-bound human IFIT1 dimers

119 a range of temperatures (12-24 °C) and sample concentrations (3.3, 8.5 and 18.0 μM). SEDFIT  
120  $c(S)$  analysis of sedimentation velocity data collected at 16 °C revealed the presence of a major  
121 sedimenting species in the IFIT1 preparation that exhibited a concentration-dependent increase in  
122 sedimentation coefficient (**Fig. 1B**). Such a concentration-dependent change in sedimentation  
123 coefficient is consistent with a reversible monomer-dimer interaction occurring during the run  
124 (28). Furthermore, the observed major  $c(S)$  peak was observed to narrow as a function of  
125 concentration, being broadest at the lowest concentration measured, consistent with an overall  
126 change in shape of the sedimenting species. Similar concentration-dependent increases in  $S_{20,w}$   
127 were observed between 12 °C and 24 °C (**Table S1**, column 3). The apparent MW of the major  
128 sedimenting species calculated by SEDFIT varied between 85-90 kDa, between the monomer MW  
129 (55.5 kDa) and dimer MW (111 kDa), as expected for a rapidly reversible monomer-dimer  
130 equilibrium occurring during the sedimentation velocity run. That the apparent MW of the major  
131 sedimenting species is closer to the predicted dimer MW, suggests that the equilibrium position is  
132 towards dimer formation at all concentrations examined. At the lowest concentration, the major  
133 sedimenting species accounted for roughly ~75 % of the total optical density at 280 nm, which  
134 increased to ~95 % at the highest concentration (**Table S1**, column 4).

### 135 **Crystallization and structure determination of human IFIT1**

136 To gain insight into the mechanism of IFIT1 dimerization, we crystallized full-length human IFIT1  
137 (residues 1-478) in complex with PPP- and m7Gppp- containing oligoadenylates (oligoA, four  
138 nucleotides in length). RNA-bound IFIT1 crystallized as a dimer with two molecules in the  
139 asymmetric unit (ASU), and the crystals diffracted X-rays to resolutions of 2.65 Å (PPP-oligoA),  
140 and 2.8 Å (m7Gppp-oligoA). The initial structures were solved by molecular replacement using  
141 RNA-bound IFIT5 as a search model, and subsequent structures determined by rigid body  
142 refinement (see **Table S2** for data collection and refinement statistics and **Fig. S1 and Fig. S2** for  
143 representative protein and RNA electron density, respectively). Superposition of all four protein

## crystal structures of RNA-bound human IFIT1 dimers

144 chains from the two co-crystal structures yields backbone root mean square deviations (r.m.s.d.)  
145 of 0.2-0.5 Å for all C<sub>α</sub> atoms, indicating minimal differences between the two molecules of the  
146 ASU or between the different RNA-bound forms (**Fig. S3A**).

147 We also determined a high resolution, 1.58 Å structure of an RNA-bound, monomeric  
148 variant of IFIT1, generated with the aid of the IFIT1 dimer structure determined here (discussed  
149 below). The structure of each molecule of IFIT1 from the wild-type dimer form is similar to the  
150 monomeric variant, except for small changes at flexible regions and near the protein C-terminus  
151 that are likely due to differences in crystal packing (**Fig. S3, B and C**). The details of IFIT1-RNA  
152 binding have already been described in an earlier study (6), and here we focus mainly on the  
153 mechanism of dimerization and conformational changes associated with RNA binding.

### 154 **Overall structure of the RNA-bound human IFIT1 dimer**

155 The two molecules of the ASU interact in a tail-to-tail manner exclusively through their C-terminal  
156 regions to form a near two-fold symmetric, S-shaped dimer with ~173° rotation between them and  
157 approximate dimensions of 140 Å x 80 Å x 50 Å (**Fig. 2A**). Each monomer of IFIT1 is composed  
158 of 23 α-helices, 18 originating from its 9 TPR motifs, organized into 3 distinct subdomains (**Fig.**  
159 **2A**). As with IFIT5, the subdomains come together to form a positively-charged RNA binding  
160 tunnel at the core of the protein, which in IFIT1 encircles the cap and four RNA nucleotides (**Fig.**  
161 **2, A, B and C**) giving rise to the preference for binding only ssRNA with unstructured 5' ends or  
162 dsRNA with 5' overhangs (5, 6, 23). The m7G moiety of the cap sits at one end of the tunnel inside  
163 a relatively hydrophobic cap-binding pocket between subdomains I and II (**Fig. 2A, B and D**). The  
164 m7G electron density in the 2.8 Å model is not well defined (**Fig. S2**), consistent with the presence  
165 of two base conformations (*syn* and *anti*) observed in the 1.58 Å structure of monomeric IFIT1  
166 with m7Gppp-RNA (6). As before, one side of the m7G base interacts with Trp 147 (through π-π  
167 stacking) and Ile 183, while the other contacts Leu 46 and Thr 48 from a 'cap-binding loop' (**Fig.**  
168 **2D**).

## crystal structures of RNA-bound human IFIT1 dimers

169           The RNA-binding tunnel continues along the central super-helix of the protein, spanning  
170 subdomain II (TPR3-TPR6), the pivot region ( $\alpha 15 + \alpha 16$ ), and the N-terminal portion of subdomain  
171 III (TPR7-TPR8) (**Fig. 2A**). The 3' end of the RNA (N4) emerges from the tunnel and points  
172 towards a positively-charged, solvent exposed groove which may contribute to non-specific RNA  
173 binding (**Fig. 2C**) (6). As with IFIT5,  $\alpha 21$  intervenes between TPR8 and TPR9 to cap the central  
174 super-helix and alter the right-handed super-helical trajectory at the end of each molecule (**Fig.**  
175 **2A**). TPR9, in turn, mediates IFIT1 dimerization. The overall arrangement of IFIT1 dimers thus  
176 positions the two RNA-binding tunnels in a roughly antiparallel fashion with respect to one  
177 another, and results in two non-contiguous RNA-binding surfaces (**Fig. 2, A and C**).

178           The elongated IFIT1 dimer is distinct from that of IFIT2 (44 % sequence identity), which  
179 forms a parallel side-to-side dimer through N-terminal domain swapping (**Fig. 2E**) (8). However,  
180 the structure of individual IFIT1 monomers is very similar to IFIT2 and IFIT5 with backbone  
181 r.m.s.d's of 2-4 Å (**Fig. S4A**), which improves to 0.44-1.1 Å when only subdomains I, II, or III are  
182 used in the superposition (**Fig. S4B**).

### 183 **Mechanism of IFIT1 dimerization**

184 TPR motifs are generally composed of a degenerate, 34 amino-acid sequence that folds into a pair  
185 of antiparallel helices (helices A and B) (4). Tandemly arranged TPR motifs will then assemble  
186 into super-helical arrays through conserved hydrophobic interactions between helices A and B  
187 within one motif, and between one TPR and helix A' of the following motif. In this manner, the  
188 minimal building block for a TPR array is 1.5 TPR motifs (or AB-A'), and the repeating pattern  
189 (i.e. AB-A'B'-A''B'') continues until the array is capped at its end by an A-like helix. When  
190 present at the C-terminus of a protein, this capping helix also functions as a 'solubility helix'. For  
191 example, in IFIT5, the very C-terminal helix  $\alpha 24$  follows TPR9 to bury its hydrophobic surface  
192 and prevent further extension of the super-helix (**Fig. 3A**). In comparison, IFIT1 is prematurely  
193 truncated because it lacks a corresponding helix  $\alpha 24$  (**Fig. 3A and 4A**). The resulting exposed



## crystal structures of RNA-bound human IFIT1 dimers

194 hydrophobic surface on TPR9 is instead capped by an opposing TPR9 from another molecule, thus  
195 forming a tail-to-tail elongated dimer.

196 The dimer interface buries  $\sim 530 \text{ \AA}^2$  of surface area (determined by PISA, (29)) and is  
197 composed of several small and large hydrophobic residues, including Leu 457, Tyr 460, and Leu  
198 464 from each TPR9 motif (**Fig. 3, B, C and D**). The interface is further stabilized by reciprocal  
199 hydrogen bonds between Tyr 460 and Glu 461, and salt bridges between Lys 448 and Glu 461  
200 (**Fig. 3B**). The residues involved in dimerization are conserved across mammalian IFIT1 genes,  
201 indicating an evolutionarily conserved mechanism for dimerization (**Fig. 4, A and B**). The  
202 interface is also conserved in IFIT1B proteins, suggesting that they use the same mechanism of  
203 homo-dimerization.

### 204 **Mutational analysis of dimerization**

205 The above described dimer is but one of several distinct dimerization interfaces in the crystal  
206 lattice. To confirm that the IFIT1 dimerization observed in our solution experiments is the one  
207 mediated by its C-terminus and not one of the other crystal packing interfaces, we performed a  
208 mutational analysis of TPR9 which we assayed by analytical gel filtration (**Fig. 5A**). Wild-type  
209 and mutant IFIT1 proteins were injected at 2 mg/ml ( $\sim 36 \mu\text{M}$ ) and, as controls, we compared their  
210 gel-filtration profiles to that of IFIT2 (109 kDa dimer), IFIT5 (56 kDa monomer), and BSA. The  
211 single point mutants L457E, Y460E, and L464E, as well as the double mutants L457A/L464A  
212 (IFIT1<sup>DM-A</sup>) and L457E/L464E (IFIT1<sup>DM-E</sup>) all disrupted dimerization. K448E had no impact,  
213 indicating that the K448-E461 salt bridge is dispensable, and E461A and E461K mutants could  
214 not be expressed. SEC-MALS was repeated to confirm the monomer MW of IFIT1<sup>DM-E</sup> (**Fig. S5A**),  
215 and sedimentation velocity AUC of IFIT1<sup>DM-E</sup> revealed that at 20 °C the SEDFIT-calculated  
216 apparent MW of the major sedimenting species (52.7, 45.1, and 49.1 kDa at 3.3, 8.5 and 18.0  $\mu\text{M}$ ,  
217 respectively) corresponded to the predicted monomer MW, with no monomer-dimer equilibrium  
218 apparent. The mutations do not disrupt the protein fold, since circular dichroism (CD) spectroscopy

## crystal structures of RNA-bound human IFIT1 dimers

219 of IFIT1, IFIT1<sup>DM-A</sup>, and IFIT1<sup>DM-E</sup> revealed no discernable differences (**Fig. S5B**). Additionally,  
220 the crystal structure of RNA-bound IFIT1<sup>DM-E</sup> described in our previous analysis of IFIT1-RNA  
221 interactions revealed no major differences between the wild-type and mutant protein (**Fig. S3B**).

222 To determine if TPR9 alone is responsible for dimerization, we created a chimera of human  
223 IFIT5  $\alpha 1$ - $\alpha 21$  (residues 1-435) and human IFIT1  $\alpha 22$ - $\alpha 23$  (TPR9, residues 437-478). Analytical  
224 gel filtration showed that the chimera can form homo-dimers in solution (**Fig. 5B**), and electro-  
225 mobility gel shift assays (EMSAs) between the chimera and a 42-nucleotide RNA (GGG42) shows  
226 that it retains binding to PPP-RNA (**Fig. 5C**). However, PPP-RNA binding by the chimera is  
227 weaker compared to IFIT5, possibly because dimerization interferes with the dynamics of IFIT5  
228 closure around the RNA. Taken together, the mutational analysis confirms the role of TPR9 and  
229 its hydrophobic surface in mediating IFIT1 dimerization, and shows that this motif can behave as  
230 an independent dimerization module.

### 231 **IFIT1 dimers form a pseudo-continuous TPR super-helix**

232 The central portion of IFIT1 dimers (TPR9s and several preceding helices) where they associate  
233 bears a striking resemblance to small TPR domains such as the synthetic TPR protein, cTPR3 (4),  
234 made up of three idealized motifs (**Fig. 6A**). In fact, the residues involved in IFIT1 dimerization  
235 from the second helix of TPR9 are highly conserved when compared to consensus TPR motif  
236 sequences derived from a large database of TPR containing proteins (**Fig. 6C**) (4). These residues  
237 are usually critical for mediating the intra-molecular TPR stacking interactions that give rise to  
238 continuous TPR arrays (**Fig. 6B**). Interestingly, however, there is one key difference between the  
239 inter-molecular stack at the IFIT1 C-terminus and canonical intra-molecular TPR stacking.  
240 Whereas canonical TPR stacking is between one TPR and helix A of the next, in IFIT1 the inter-  
241 molecular stacking is between TPR9 and helix B of the adjoining TPR9 instead of another A-like  
242 helix (**Fig. 6, A and B**). Thus, the two TPR9 motifs of each IFIT1 molecule interact in a manner

## crystal structures of RNA-bound human IFIT1 dimers

243 that is analogous to intra-molecular TPR stacking, and form a pseudo-continuous TPR super-helix  
244 which is responsible for IFIT1 dimerization.

### 245 **IFIT1 dimerization is dispensable for full RNA binding and inhibition of translation**

246 To investigate the role of dimerization in RNA binding by IFIT1, we performed an EMSA utilizing  
247 a 43-nucleotide m7Gppp-RNA with a five-residue overhang at the 5' end, which is optimal for  
248 IFIT1 binding (6). The capped RNA was fluorescently labelled at the 3' end with pCp-Cy5, and  
249 binding to wild-type IFIT1 and the monomeric mutant IFIT1<sup>DM-E</sup> was tested (**Fig. 7A**). Both  
250 proteins bound the capped RNA with the same apparent affinity of ~ 50-100 nM, suggesting that  
251 dimerization is not required for optimal RNA binding. Moreover, SYBR-Gold stained EMSAs  
252 with other unlabeled m7Gppp-RNAs, including two virus derived sequences, showed similar  
253 results (**Fig. S6**).

254 We next looked at the impact of dimerization on IFIT1 translational inhibition. To address  
255 this, we utilized an *in vitro* translation system consisting of Krebs extracts programmed with a  
256 bicistronic mRNA reporter (**Fig. 7B**) (30). The first open reading frame (ORF) produces Firefly  
257 luciferase (FF) in a cap-dependent manner, and should be susceptible to IFIT1 inhibition, while  
258 the second ORF expresses *Renilla* luciferase (Ren) under the control of an internal ribosome entry  
259 site (IRES) from hepatitis C virus (HCV), and would reveal the levels non-specific IFIT1 activity.  
260 Titrating IFIT1 or IFIT1<sup>DM-E</sup> into the extracts at concentrations of 30 nM to 5  $\mu$ M resulted in  
261 similar reductions of FF levels (compared to buffer control) (**Fig. 7C**). In both cases, Ren levels  
262 only dropped by 5-10 % indicating minimal non-specific activity. Thus, IFIT1 and IFIT1<sup>DM-E</sup> exert  
263 similar translation inhibition, confirming that homo-dimerization is not required for IFIT1  
264 inhibitory activity in an *in vitro* setting.

### 265 **RNA binding is associated with large-scale conformational changes**

266 The means by which RNA gains entry to its binding site in IFIT1 is not immediately apparent,  
267 particularly because of the narrow shape and depth of the tunnel. To gain insight into the RNA-

## crystal structures of RNA-bound human IFIT1 dimers

268 dependent conformational changes, we performed limited protease digestion of IFIT1 with trypsin  
269 and endoproteinase Glu-C, which revealed that both PPP-oligoA- and capped-oligoA-bound IFIT1  
270 exhibit a greater degree of stabilization than RNA-free IFIT1 (**Fig. 8A**). The capped-RNA bound  
271 complex was more resistant to proteolysis than PPP-RNA-bound IFIT1, which reflects either  
272 specific conformational changes associated with capped-RNA binding or, more likely, the stronger  
273 affinity of IFIT1 towards capped-RNA (6, 22).

274 The two major stable fragments resulting from endoproteinase Glu-C treatment of IFIT1  
275 without RNA have apparent MWs of ~ 35 and ~ 32 kDa (**Fig. 8A, bottom**). We further examined  
276 these using in-gel tryptic digestion followed by LC/MS/MS, which showed that both originate  
277 from the protein N-terminus, namely subdomains I and II (**Fig. S7, A and B**). Intact protein MS  
278 of the second fragment indicates that it is the result of cleavage at Glu 272 (**Fig. S7, C and D**), and  
279 corresponds to the elastase-resistant fragment of human IFIT1 previously crystallized (**Fig. 8B**).  
280 When Glu-C cleavage was repeated in 0.1 M ammonium bicarbonate buffer, we observed slower  
281 kinetics of degradation, which we took advantage of to follow the IFIT1/Glu-C degradation profile  
282 over a period of 17 hours (**Fig. 8C**). The extended time course shows that 32 kDa fragment is  
283 derived from the ~ 35 kDa fragment, and also reveals the presence of several intermediate ~ 40-  
284 48 kDa fragments within the first hour, which are likely due to cleavage at one of several positions  
285 on subdomain III. Thus, it would appear that the IFIT1 C-terminus exists in one or more open  
286 conformations that are susceptible to limited protease digestion, facilitating RNA entry into the  
287 narrow tunnel.

### 288 **A flexible cap-binding loop facilitates m7G recognition**

289 Given that mRNA likely enters the tunnel from the C-terminal side of the protein, it is unclear how  
290 the m7G moiety is accommodated inside the cap-binding pocket, which forms a narrow, circular  
291 extension at the N-terminal side of the tunnel (**Fig. 2B**). To address this, we compared the  
292 structures of PPP-RNA-bound and m7Gppp-RNA-bound IFIT1, which revealed small-scale

## crystal structures of RNA-bound human IFIT1 dimers

293 conformational within the cap-binding loop (residues 45-50). This loop forms one wall of the cap-  
294 binding pocket and is stabilized by binding of the m7G moiety, as it is somewhat disordered in the  
295 PPP-RNA structure (**Fig. 8, D and E**). However, based on crystal temperature factors it seems that  
296 the loop retains its dynamic nature even in the presence of the cap (**Fig. S8A**). In the crystal  
297 structure of RNA-free, N-terminal IFIT1 (composed of SD I+II (5)), the cap-binding loop also  
298 appears to be mobile as it has high temperature factors (**Fig. S8B**). Interestingly, these small-scale  
299 conformational changes were not evident from the high-resolution structures of the monomeric  
300 IFIT1<sup>DM-E</sup> bound to PPP- and m7Gppp-RNA, since the cap-binding pocket of its PPP-RNA bound  
301 form was occupied by PEG molecules from the crystallization solution, artificially stabilizing the  
302 cap-binding loop (6). Nevertheless, the plasticity of the cap-binding loop is likely to be an  
303 important element in m7G recognition, as it would facilitate mRNA binding by leaving the cap-  
304 binding pocket in a more open and accessible state (**Fig. 8E**). On the other hand, the critical cap-  
305 binding residue Trp 147 is coordinated by Glu 176 in all structures, and appears to form a pre-  
306 organized ‘landing pad’ for m7G binding (**Fig. 2D**). Supporting the importance of the W147-E176  
307 interaction for IFIT1 function, disrupting this coordinating pair through mutation (W147F or  
308 E176A) reduced binding to capped-RNA and translational inhibitory activity (6).

## 309 **Discussion**

310 The Interferon-Induced Proteins with Tetratricopeptide Repeats family has been reported to  
311 mediate their antiviral effects through various mechanisms (31). Central to this ability is the TPR  
312 motif, a versatile protein-protein interaction module which in IFITs has also adapted to interact  
313 with virus-derived RNA (5, 6, 32). One facet of IFIT antiviral activity is the formation of an IFN-  
314 dependent, multi-protein complex with IFIT1, IFIT2, and IFIT3 at its core (19). The mechanisms  
315 regulating homo- and hetero-oligomerization of the IFIT core of this complex remain poorly  
316 characterized. The crystal structure of IFIT2 showed that it homo-dimerizes *via* domain swapping  
317 in which the N-terminal portion of its subdomain II (helices  $\alpha 7$ - $\alpha 9$ ) is exchanged between the

## crystal structures of RNA-bound human IFIT1 dimers

318 interacting IFIT2 molecules (8). We report here the structural basis for IFIT1 dimerization, which  
319 utilizes a different mechanism for self-association. IFIT1 dimerizes through the formation of a C-  
320 terminal, pseudo-continuous TPR super-helix, which forms in a manner that mimics naturally  
321 occurring, intra-molecular TPR-stacking interactions that normally give rise to continuous TPR  
322 arrays.

323 TPR containing proteins have been shown to assemble into homo-dimers and higher order  
324 complexes using diverse mechanisms, ranging from those which resemble TPR-peptide  
325 interactions (e.g. the self-assembling, magnetosome-forming MamA (33)), to interactions which  
326 involve entire TPR domains encircling each other and burying up to  $6000 \text{ \AA}^2$  (e.g. subunits of the  
327 anaphase-promoting complex (34)). The crystal structure of an engineered TPR domain made up  
328 of consensus motifs (CTPR3Y3) has been shown to assemble into trimers with one interface  
329 forming a C-terminal pseudo-continuous super-helix (35), similar to IFIT1. As with IFIT1, the  
330 pseudo-continuous super-helix of CTPR3Y3 involves displacement of a C-terminal capping helix,  
331 except in IFIT1 this capping helix appears to be lost due to a C-terminal truncation (when  
332 compared to IFIT5). Nevertheless, our structure confirms the notion that displacement or loss of a  
333 capping-helix giving rise to pseudo-continuous TPR arrays may be a general mechanism for TPR  
334 protein oligomerization (35). We propose that TPR9 can be used as a TPR dimerization module to  
335 facilitate the design of self-assembling TPR molecules. We demonstrated the feasibility of this by  
336 grafting the IFIT1 TPR9 sequence onto human IFIT5, thereby converting it from a monomer to a  
337 dimer.

338 TPR proteins have also been reported to form crystallographic dimers that wouldn't  
339 otherwise form in solution (36), but we thoroughly validated the presence of IFIT1 dimerization  
340 in solution using gel-filtration, SEC-MALS, and AUC. These data are consistent with the  
341 formation of IFIT1 oligomers during RNA-binding gel shift assays and during protein blue-native  
342 PAGE electrophoresis (22). Additionally, human and rabbit IFIT1 were shown to bind capped-

## crystal structures of RNA-bound human IFIT1 dimers

343 RNA with low-level positive cooperativity (Hill coefficient,  $n = 1.6-1.7$ ) (22). However, co-  
344 immunoprecipitation assays failed to detect an IFIT1 self-interaction in human cells (19), possibly  
345 because the interaction is relatively weak. This is supported by our AUC analysis where we  
346 observed that wild-type IFIT1 had established a rapidly reversible monomer-dimer equilibrium  
347 during centrifugation. Furthermore, the relatively small dimerization interface burying only  $\sim 530$   
348  $\text{\AA}^2$  is smaller than expected for a stable self-interaction (37).

349         Regardless, during AUC IFIT1 is still predominantly dimeric at  $3.3 \mu\text{M}$ , and given that  
350 IFIT1 is highly expressed upon induction where its levels can approach 1-2 million copies per cell  
351 (19), it is likely that physiological concentrations of IFIT1 are within a range that promotes dimer  
352 formation. Moreover, IFIT1 has been shown to re-localize to discrete spots following transfection  
353 of PPP-RNA (19), where even higher local concentrations would favor dimerization. However,  
354 although IFIT1 dimer formation *in vivo* is a likely scenario, the possibility remains that it is non-  
355 physiological. Since human IFIT1 is at the center of a large multi-protein complex (19), isolating  
356 it *in vitro* could give rise to artifacts. In this case, IFIT1 homo-dimerization may be due to residual  
357 binding that is a consequence of IFIT1 hetero-oligomerization with other members of the  
358 interactome, such as IFIT2 or IFIT3.

359         Most mammals encode an IFIT1 protein and an IFIT1B protein (3). However, in mice,  
360 IFIT1 appears to be deleted and instead they have three copies of IFIT1B (3), referred to as mouse  
361 *Ifit1*, mouse *Ifit1b*, and mouse *Ifit1c* (with 58-77 % sequence identity between them). On the other  
362 hand, in humans, IFIT1B expression has not been shown to change with IFN treatment (27), and  
363 heterologous overexpression in yeast suggests that it lacks a function in RNA binding and  
364 translational inhibition (3). Nevertheless, the conserved nature of the IFIT1 dimerization interface  
365 suggests that mammalian IFIT1B proteins homo-dimerize in the same manner, and may even form  
366 hetero-dimers with IFIT1 or other IFIT1B-like proteins through the same interface. Supporting  
367 this notion, mouse *Ifit1c* was found to co-purify with mouse *Ifit1* in capped-RNA pulldowns (21).

## crystal structures of RNA-bound human IFIT1 dimers

368 Although it remains to be shown, hetero-dimerization through this interface could regulate RNA  
369 binding or serve to expand the protein-protein interaction network of IFIT1, therefore diversifying  
370 IFIT1-mediated antiviral responses.

371 Although foot-printing primer-extension assays performed under equilibrium binding  
372 conditions revealed that human IFIT1 can bind capped-RNA with positive cooperativity (22), our  
373 gel-shift RNA binding assays did not reveal a difference in apparent affinity between monomeric  
374 and dimeric IFIT1. One possible explanation for this discrepancy is that EMSAs are not a true  
375 equilibrium method, and complex formation is susceptible to variations in the assay conditions  
376 (38, 39), therefore the apparent RNA-binding affinities of IFIT1 and the monomeric mutant could  
377 be affected. Future assays performed under equilibrium conditions (e.g. primer-extension foot-  
378 printing, fluorescence polarization, or isothermal titration calorimetry) could be performed to  
379 clarify the role of dimerization in RNA binding. Of note, our attempts at isothermal titration  
380 calorimetry with human IFIT1 were unsuccessful due protein precipitation during the experiment.  
381 Regardless, the translation assays in Krebs extracts indicate that homo-dimerization is dispensable  
382 for translational inhibition by IFIT1, at least under this *in vitro* setting.

383 Finally, comparison of the different RNA bound forms of IFIT1 complemented with  
384 limited protease digestion revealed large-scale and small-scale conformational changes associated  
385 with RNA binding. Based on the structural analysis, limited proteolysis, and previous work with  
386 human IFIT5 (5), we propose the following model for capped mRNA binding by IFIT1 in solution.  
387 IFIT1 exists in one or more open conformations that are amenable for RNA entry into the tunnel.  
388 Upon binding the 5' end of mRNA (nucleotides 1-4), IFIT1 undergoes conformational changes at  
389 its C-terminus that are facilitated by the pivot region, as was seen in IFIT5 (5). At the same time,  
390 or in a subsequent step, the m7G moiety is directed towards the cap-binding pocket, which would  
391 initially be in a more open and accessible state as indicated by the dynamic nature of the cap-  
392 binding loop. Recognition by Trp 147 and stabilization of the cap-binding loop would then be the



## crystal structures of RNA-bound human IFIT1 dimers

393 last in a series of coordinated steps required for mRNA binding. The RNA-dependent  
394 conformational changes would help IFIT1 clamp down on viral mRNA, thus decreasing its rate of  
395 dissociation, and prevent translation initiation factors from outcompeting IFIT1 once it is bound.  
396 Both the large scale and small scale conformational changes described here are also likely  
397 impacted by other members of the IFIT interactome, further enhancing or limiting IFIT1 antiviral  
398 activity *in vivo*.

399 In summary, we have determined the crystal structure of human IFIT1, a central component  
400 of the IFIT interactome, in its native, dimeric form. The structure shows that IFIT1 uses a small  
401 C-terminal interface to form extended, antiparallel dimers that are distinct from the parallel,  
402 domain-swapped dimers of IFIT2. This arrangement of IFIT1 dimers could combine with the  
403 parallel interface found in IFIT2 to initiate interactome assembly. Alternatively, IFIT2 or IFIT3  
404 could compete with the IFIT1 homo-dimerization interface to build up the interactome. As these  
405 interactions could be important for regulating IFIT1 conformational changes and inhibitory  
406 activity, our results will contribute to piecing together the network of interactions that regulate  
407 IFIT proteins' role in the antiviral innate immune response.

### 408 **Experimental Procedures**

409 *Plasmids*– IFIT1, IFIT2, and IFIT5 were sub-cloned into pSMT3 between BamHI and NotI sites,  
410 resulting in a fusion protein with an N-terminal, Ulp1-cleavable 6xHis-Sumo tag (40). IFIT1 point  
411 mutants were generated by site-directed mutagenesis using iProof High-Fidelity DNA polymerase  
412 (Bio-Rad). The chimera made up of IFIT5 (residues 1-435) and IFIT1 (residues 437-478) was  
413 generated using overlap-extension PCR, and sub-cloned into pSMT3 between BamHI and NotI.

414 *Expression and purification of IFIT proteins*– IFIT1, IFIT1 mutants and IFIT5 expression and  
415 purification are described elsewhere (6). The IFIT5/IFIT1 chimera was expressed in Rosetta 2  
416 (DE3) pLysS BL21 cells (Novagen) by first growing transformed cells in LB at 37 °C until an  
417 OD<sub>600</sub> of 0.6-0.8, followed by induction with 1 mM IPTG and growing the cells for 4 hours at 30

## crystal structures of RNA-bound human IFIT1 dimers

418 °C. The protein was purified by Ni-affinity chromatography followed by cleavage of the tag. The  
419 cleaved protein was further purified by passing over a 5 ml HiTrap SP HP column (GE Healthcare)  
420 equilibrated with 50 mM HEPES pH 7.5 and 1 mM DTT, followed by washing with 50 mM  
421 HEPES pH 7.5, 100 mM NaCl, and 1 mM DTT, and eluted with 50 mM HEPES pH 7.5, 400 mM  
422 NaCl, and 1 mM DTT. IFIT2 was expressed in BL21 (DE3) and purified using 2-step Ni-affinity  
423 chromatography (with cleavage of the tag) using standard protocols. All proteins were further  
424 purified by gel filtration using superdex 200 10/300 or 16/60 columns (GE Healthcare) in 20 mM  
425 Tris pH 7.6, 150 mM NaCl and 1 mM DTT.

426 *Preparation of PPP and m7Gppp containing oligoadenylate RNA*– PPP-AAAA and Gppp-AAAA  
427 were prepared using phosphoramidite solid phase synthesis followed by installation of the  
428 triphosphate or cap moieties as previously described (6); the oligos were purified by HPLC and  
429 characterized by LC-MS as before (6). m7Gppp-AAAA was prepared by enzymatically modifying  
430 Gppp-AAAA with purified mRNA cap guanine-N7 methyltransferase as before (6).

431 *Crystallization and data collection*– Wild-type human IFIT1 was mixed with molar excess  
432 chemically synthesized oligos either directly before crystallization or prior to gel filtration. The  
433 protein buffer was 20 mM Tris pH 7.6, 150 mM NaCl and 1 mM TCEP. The co-crystals were  
434 obtained with 2-4 mg/ml protein drops mixed 1:1 with reservoir solution containing 27-32 % PEG  
435 200 (Sigma), 0.1 M Tris pH 8.1, and 200 mM CaCl<sub>2</sub> using the hanging drop vapour diffusion  
436 method at 4 °C. Crystals were flash frozen in liquid nitrogen without additional cryo-protection.  
437 All data were collected at 100K with 0.979 Å X-rays on beamline 08ID-1 at the CLS, which was  
438 equipped with a Mar300CCD detector (41), and the images integrated, scaled, and merged using  
439 the HKL2000 suite (43). Data were truncated with Ctruncate (ccp4 suite (42)) and 5 % of  
440 reflections were set aside for the R<sub>free</sub> set. Only the highest resolution dataset was used as a master  
441 file to generate all R<sub>free</sub> sets. Data collection statistics from HKL2000 are in **Table S2**.

## crystal structures of RNA-bound human IFIT1 dimers

442 *Structure determination, model building, and refinement*– The initial crystal structure was  
443 determined by molecular replacement using the PHASER program in Phenix (43). The structure  
444 of RNA-bound human IFIT5 (residues 1-434) was used as a search model. The remaining 3 helices  
445 of IFIT1 (residues 437-469) were built manually after one macro-cycle of refinement in Phenix  
446 (45). Subsequent structures were determined with rigid body refinement with the protein only.  
447 Restraints for m7GpppA were calculated using Phenix eLBOW (44). The structures were refined  
448 iteratively using Phenix with manual model building in Coot (46). The refinement strategy  
449 included all-isotropic B-factor refinement and TLS. The final models contained protein residues  
450 9-84, 91-305, and 310-469 for m7Gppp-RNA bound IFIT1 chain A; 9-84, 90-304, and 315-469  
451 for m7Gppp-RNA bound IFIT1 chain C; 9-46, 51-81, 92-247, 251-301, and 316-469 for PPP-RNA  
452 bound IFIT1 chain A; and 9-46, 51-81, 92-247, 251-305, and 314-469 for PPP-RNA bound IFIT1  
453 chain C. Structure validation was performed with MOLPROBITY in Phenix (47). Ramachandran  
454 statistics are as follows: IFIT1 with m7Gppp-RNA, 98.5 % favored, 0 % outliers, 0.25 % rotamer  
455 outliers; and IFIT1 with PPP-RNA: 98.2 % favored, 0 % outliers, 0.4 % rotamer outliers. The  
456 MOLPROBITY overall scores for the m7Gppp-RNA and PPP-RNA-bound structures were 0.58  
457 and 0.63, respectively. Refinement statistics are in **Table S2**.

458 *Sequence and structure analysis*– APBS was used to calculate the surface electrostatic potential  
459 (48), and PyMol to generate all molecular figures (<https://www.pymol.org/>). For surface  
460 electrostatic analysis, all surfaces are colored by electrostatic potential from negative (-10 kTe-1;  
461 red) to positive (+10 kTe-1; blue). ESPript was used to generate the sequence alignment in Fig.  
462 4A (49). Sequence conservation analysis by WebLogo (50) in Fig. 4B was performed as described  
463 (6).

464 *Analytical gel filtration*– 500  $\mu$ L (Fig. 5A) or 250  $\mu$ L (Fig. 5B) of purified protein at 2 mg/ml were  
465 injected onto a superdex 200 10/300 increase column (GE Healthcare) equilibrated in 20 mM Tris

## crystal structures of RNA-bound human IFIT1 dimers

466 pH 7.6 and 150 mM NaCl. 1  $\mu$ g (Fig. 5A) or 2  $\mu$ g (Fig. 5B) of the input proteins were run on 12  
467 % SDS-PAGE and visualized by coomassie staining.

468 *Analytical ultracentrifugation*– Sedimentation velocity experiments were performed in a Beckman  
469 XL-I analytical ultracentrifuge using an An-60Ti rotor. Solutions containing 20 mM Tris pH 7.6,  
470 150 mM NaCl, 0.5 mM TCEP and varying concentrations of IFIT1 (3.3  $\mu$ M, 8.5  $\mu$ M , and 18.0  
471  $\mu$ M) were centrifuged at 50,000 rpm over approximately 8h. A total of 200 scans were collected  
472 per run, with absorbances measured at 280 nm. Sedimentation velocity data were fit to the  $c(S)$   
473 model using the computer program SEDFIT (28). Sedimentation coefficients were determined by  
474 integration of  $c(S)$  distributions in SEDFIT and then transformed into  $S_{20,W}$  values. The program  
475 SEDNTERP (v1.09, <http://www.jphilo.mailway.com/>) was used for calculation of solution  
476 viscosity, solution density, and IFIT1 partial specific volume (from primary amino acid sequence)  
477 at each temperature examined.

478 *Multi-angle light scattering with inline size-exclusion chromatography (SEC-MALS)*– 50  $\mu$ L of  
479 purified IFIT1 (10 mg/ml), IFIT1<sup>DM-E</sup> (12 mg/ml), or BSA (10.5 mg/ml) were injected onto  
480 superdex 200 10/300 increase (GE Healthcare) equilibrated with 20 mM Tris pH 7.6 and 150 mM  
481 NaCl. Measurements were performed using a Waters e2796 Separations module (Waters  
482 Corporation) equipped with an in-line Waters 2489 UV/Visible detector set to 280nm (Waters  
483 corporation), a miniDAWN TREOS multi-angle light scattering detector with a 656nm laser  
484 (Wyatt Technology), and an Optilab rEX differential refractive index detector (Wyatt  
485 Technology). Data was processed and analyzed using the ASTRA software package (version  
486 5.3.4.18 from Wyatt technology).

487 *Limited Protease Digestion*–PPP-oligoA or Gppp-oligoA were re-suspended in water at a final  
488 concentration of 10 nmol/ $\mu$ L. 1.26 nmol IFIT1 (70  $\mu$ g) in gel filtration buffer were mixed with  
489 either 15  $\mu$ L water, 15  $\mu$ L PPP-oligoA (1.5 nmol), or 15  $\mu$ L Gppp-oligoA (1.5 nmol) at a final  
490 volume of 70  $\mu$ L, resulting in 10 mg/ml (10X) protein stocks with or without RNA. 10X protease

## crystal structures of RNA-bound human IFIT1 dimers

491 stocks were prepared in 20 mM HEPES pH 7.5, 50 mM KCl, and 20 mM Mg<sub>2</sub>SO<sub>4</sub> (Cleavage  
492 buffer), resulting in a 1 mg/ml endoproteinase Glu-C stock and 0.04 mg/ml trypsin stock. For each  
493 reaction (corresponding to each lane in Fig. 8A), 1.6 μL of 10X protein and 1.6 μL of 10X protease  
494 were mixed at a final volume of 16 μL in Cleavage buffer and the reaction carried out at room  
495 temperature. At the indicated time points, the reactions were stopped with 4 μL of 5X SDS loading  
496 buffer, boiled for 10 minutes, and stored at -20 °C until the samples were ready to be run on 12 %  
497 SDS-PAGE. For the extended time-course (also performed at room temperature), 150 μg IFIT1  
498 was mixed with 15 μg Glu-C in 150 μL containing 0.1 ammonium bicarbonate buffer pH 7.8. At  
499 the indicated time points, 16 μL of the reaction were removed and mixed with 4 μL of 5X SDS  
500 loading buffer, then boiled for 10 minutes, and stored at -20 °C until the samples were ready to be  
501 run on 12 % SDS-PAGE.

502 *RNA electro-mobility gel shift assays (EMSA)*– Capped RNAs for EMSAs were prepared by *in*  
503 *vitro* transcription with T7 RNA polymerase followed by PAGE purification and post-  
504 transcriptional capping with the vaccinia capping system (NEB) as previously described (6).  
505 Preparation of pCp-labelled RNA was performed with T4 RNA ligase (NEB) as previously  
506 described (6). Gel shifts were performed exactly as described before (6).

507 *Circular dichroism (CD) spectroscopy*– IFIT1, IFIT1<sup>DM-A</sup>, or IFIT1<sup>DM-E</sup> were buffer exchanged  
508 into 50 mM Na<sub>2</sub>HPO<sub>4</sub>/NaH<sub>2</sub>PO<sub>4</sub> pH 8 and diluted to a final concentration of 0.5  
509 mg/ml. Measurements were performed on a Chirascan CD spectrometer using a 0.2 mm quartz  
510 cell. CD wavelength scans were obtained at 21 °C, with 1 nm step size and 0.5 s time intervals.  
511 The signals obtained were in CD millidegrees and are represented as an average of three spectra  
512 obtained for each sample. The averaged spectra were smoothed using the Savitsky-Golay  
513 method and a window size of 3.

514 *In vitro translation assay with Krebs extracts*– Preparation of reporter mRNA and *in vitro*  
515 translation assay were performed as before (6). Briefly, pSP-(CAGless)/FF/HCV/Ren plasmid was

## crystal structures of RNA-bound human IFIT1 dimers

516 linearized with BamHI and transcribed with SP6 RNA polymerase in the presence of  
517 m7G(5')ppp(5')G cap analog (NEB). *In vitro* translations were set up at a final volume of 10  $\mu$ l  
518 with 4 ng/ $\mu$ L reporter mRNA (~ 4 nM final) and 1  $\mu$ L wild-type IFIT1 or IFIT1<sup>DM-E</sup> in untreated  
519 Krebs-2 extracts. The reactions were set up on ice and translation was allowed to proceed for 1 hr  
520 at 30 °C. The reactions were stopped on ice, and FF and Ren luciferase activities (RLU) were  
521 measured on a Berthold Lumat LB 9507 luminometer. Values obtained were normalized against  
522 buffer control, which was set at 1. The following final protein concentrations were used: 0.031,  
523 0.062, 0.125, 0.250, 0.5, 1, and 5  $\mu$ M.

### 524 **Accession codes**

525 Coordinates and structure factor data for the structures reported in this study were deposited in the  
526 Protein Data Bank under the accession codes 5W5H (IFIT1 + m7Gppp-AAAA) and 5W5I (IFIT1  
527 + PPP-AAAA)

### 528 **Acknowledgements**

529 We thank the CMCF staff for X-ray data collection performed on beamline 08ID-1 at the Canadian  
530 Light Source, which is supported by the Canada Foundation for Innovation, Natural Sciences and  
531 Engineering Research Council of Canada, the University of Saskatchewan, the Government of  
532 Saskatchewan, Western Economic Diversification Canada, the National Research Council Canada,  
533 and the Canadian Institutes of Health Research. Analytical ultracentrifugation experiments were  
534 performed using a Beckman XL-I analytical ultracentrifuge housed in the Concordia Centre for  
535 Structural and Functional Genomics (CSFG). We thank Piratip Pratumswan and Stefannie Neun  
536 for preliminary protein characterization and technical assistance, and Maxime Isabelle for protein  
537 mass spectrometry. Support was provided by the CIHR Strategic Training Initiative in Chemical  
538 Biology and the NSERC CREATE Training Program in Bionanomachines (Y.M.A.); a Canada  
539 Research Chair (B.N.); Canadian Institutes of Health Research Grants (MOP-133535, B.N. and  
540 FDN-148366, J.P.); Discovery Grants from the Natural Sciences and Engineering Research

## crystal structures of RNA-bound human IFIT1 dimers

541 Council of Canada (M.J.D. and P.D.P.); and the McGill CIHR Drug Development Training  
542 Program (S.M-M.).

### 543 **Conflict of interest**

544 The authors declare that they have no conflicts of interest with the contents of this article.

### 545 **Author Contributions**

546 B.N. and Y.M.A. designed the study and prepared the manuscript with input from all authors;  
547 B.N., J.P., and M.J.D. supervised the work; Y.M.A. prepared proteins and RNA, and performed  
548 structural work, SEC-MALS, limited proteolysis, CD spectroscopy, analytical gel filtration, and  
549 EMSAs; S.M-M. performed chemical synthesis and purification of PPP- and Gppp-oligoA; R.C.  
550 prepared translation extracts and reporter mRNA, and performed translation assays; P.D.P.  
551 performed AUC data collection and analysis.

### 552 **References**

- 553 1. Fensterl, V., Chattopadhyay, S., and Sen, G. C. (2015) No Love Lost Between Viruses  
554 and Interferons. *Annual Review of Virology*. **2**, 549–572
- 555 2. Fensterl, V., and Sen, G. C. (2015) Interferon-induced Ifit proteins: their role in viral  
556 pathogenesis. *J Virol*. **89**, 2462–2468
- 557 3. Daugherty, M. D., Schaller, A. M., Geballe, A. P., and Malik, H. S. (2016) Evolution-  
558 guided functional analyses reveal diverse antiviral specificities encoded by IFIT1 genes in  
559 mammals. *elife*. **5**, 60
- 560 4. Main, E. R. G., Xiong, Y., Cocco, M. J., D'Andrea, L., and Regan, L. (2003) Design of  
561 stable alpha-helical arrays from an idealized TPR motif. *Structure*. **11**, 497–508
- 562 5. Abbas, Y. M., Pichlmair, A., Gónna, M. W., Superti-Furga, G., and Nagar, B. (2013)  
563 Structural basis for viral 5'-PPP-RNA recognition by human IFIT proteins. *Nature*. **494**,  
564 60–64
- 565 6. Abbas, Y. M., Laudenbach, B. T., Martínez-Montero, S., Cencic, R., Habjan, M.,  
566 Pichlmair, A., Damha, M. J., Pelletier, J., and Nagar, B. (2017) Structure of human IFIT1  
567 with capped RNA reveals adaptable mRNA binding and mechanisms for sensing N1 and  
568 N2 ribose 2'-O methylations. *Proceedings of the National Academy of Sciences*.  
569 10.1073/pnas.1612444114
- 570 7. Katibah, G. E., Lee, H. J., Huizar, J. P., Vogan, J. M., Alber, T., and Collins, K. (2013)  
571 tRNA binding, structure, and localization of the human interferon-induced protein IFIT5.  
572 *Mol Cell*. **49**, 743–750
- 573 8. Yang, Z., Liang, H., Zhou, Q., Li, Y., Chen, H., Ye, W., Chen, D., Fleming, J., Shu, H.,  
574 and Liu, Y. (2012) Crystal structure of ISG54 reveals a novel RNA binding structure and  
575 potential functional mechanisms. *Cell Res*. **22**, 1328–1338

crystal structures of RNA-bound human IFIT1 dimers

- 576 9. Feng, F., Yuan, L., Wang, Y. E., Crowley, C., Lv, Z., Li, J., Liu, Y., Cheng, G., Zeng, S.,  
577 and Liang, H. (2013) Crystal structure and nucleotide selectivity of human IFIT5/ISG58.  
578 *Cell Res.* **23**, 1055–1058
- 579 10. D'Andrea, L. D., and Regan, L. (2003) TPR proteins: the versatile helix. *Trends Biochem*  
580 *Sci.* **28**, 655–662
- 581 11. Feng, X., Wang, Y., Ma, Z., Yang, R., Liang, S., Zhang, M., Song, S., Li, S., Liu, G., Fan,  
582 D., and Gao, S. (2014) MicroRNA-645, up-regulated in human adenocarcinoma of gastric  
583 esophageal junction, inhibits apoptosis by targeting tumor suppressor IFIT2. *BMC*  
584 *Cancer.* **14**, 633
- 585 12. Xiao, S., Li, D., Zhu, H.-Q., Song, M.-G., Pan, X.-R., Jia, P.-M., Peng, L.-L., Dou, A.-X.,  
586 Chen, G.-Q., Chen, S.-J., Chen, Z., and Tong, J.-H. (2006) RIG-G as a key mediator of the  
587 antiproliferative activity of interferon-related pathways through enhancing p21 and p27  
588 proteins. *Proc Natl Acad Sci USA.* **103**, 16448–16453
- 589 13. Lai, K. C., Liu, C. J., Chang, K. W., and Lee, T. C. (2013) Depleting IFIT2 mediates  
590 atypical PKC signaling to enhance the migration and metastatic activity of oral squamous  
591 cell carcinoma cells. *Oncogene.* **32**, 3686–3697
- 592 14. Lai, K.-C., Chang, K.-W., Liu, C.-J., Kao, S.-Y., and Lee, T.-C. (2008) IFN-induced  
593 protein with tetratricopeptide repeats 2 inhibits migration activity and increases survival of  
594 oral squamous cell carcinoma. *Mol. Cancer Res.* **6**, 1431–1439
- 595 15. Stawowczyk, M., Van Scoy, S., Kumar, K. P., and Reich, N. C. (2011) The interferon  
596 stimulated gene 54 promotes apoptosis. *Journal of Biological Chemistry.* **286**, 7257–7266
- 597 16. Berchtold, S., Manncke, B., Klenk, J., Geisel, J., Autenrieth, I. B., and Bohn, E. (2008)  
598 Forced IFIT-2 expression represses LPS induced TNF-alpha expression at  
599 posttranscriptional levels. *BMC Immunol.* **9**, 75
- 600 17. Li, Y., Li, C., Xue, P., Zhong, B., Mao, A.-P., Ran, Y., Chen, H., Wang, Y.-Y., Yang, F.,  
601 and Shu, H.-B. (2009) ISG56 is a negative-feedback regulator of virus-triggered signaling  
602 and cellular antiviral response. *Proceedings of the National Academy of Sciences.* **106**,  
603 7945–7950
- 604 18. Liu, X. Y., Chen, W., Wei, B., Shan, Y. F., and Wang, C. (2011) IFN-Induced TPR  
605 Protein IFIT3 Potentiates Antiviral Signaling by Bridging MAVS and TBK1. *The Journal*  
606 *of Immunology.* **187**, 2559–2568
- 607 19. Pichlmair, A., Lassnig, C., Eberle, C.-A., Gónna, M. W., Baumann, C. L., Burkard, T. R.,  
608 Bürckstümmer, T., Stefanovic, A., Krieger, S., Bennett, K. L., Rüllicke, T., Weber, F.,  
609 Colinge, J., Müller, M., and Superti-Furga, G. (2011) IFIT1 is an antiviral protein that  
610 recognizes 5'-triphosphate RNA. *Nat Immunol.* **12**, 624–630
- 611 20. Kimura, T., Katoh, H., Kayama, H., Saiga, H., Okuyama, M., Okamoto, T., Umemoto, E.,  
612 Matsuura, Y., Yamamoto, M., and Takeda, K. (2013) Ifit1 inhibits JEV replication  
613 through binding to 5' capped 2'-O unmethylated RNA. *J Virol.* **87**, 9997–10003
- 614 21. Habjan, M., Hubel, P., Lacerda, L., Benda, C., Holze, C., Eberl, C. H., Mann, A., Kindler,  
615 E., Gil-Cruz, C., Ziebuhr, J., Thiel, V., and Pichlmair, A. (2013) Sequestration by IFIT1  
616 Impairs Translation of 2'-O-unmethylated Capped RNA. *PLoS Pathog.* **9**, e1003663
- 617 22. Kumar, P., Sweeney, T. R., Skabkin, M. A., Skabkina, O. V., Hellen, C. U. T., and  
618 Pestova, T. V. (2014) Inhibition of translation by IFIT family members is determined by  
619 their ability to interact selectively with the 5'-terminal regions of cap0-, cap1- and 5'ppp-  
620 mRNAs. *Nucleic Acids Res.* **42**, 3228–3245



crystal structures of RNA-bound human IFIT1 dimers

- 621 23. Hyde, J. L., Gardner, C. L., Kimura, T., White, J. P., Liu, G., Trobaugh, D. W., Huang, C.,  
622 Tonelli, M., Paessler, S., Takeda, K., Klimstra, W. B., Amarasinghe, G. K., and Diamond,  
623 M. S. (2014) A viral RNA structural element alters host recognition of nonself RNA.  
624 *Science*. **343**, 783–787
- 625 24. Daffis, S., Szretter, K. J., Schriewer, J., Li, J., Youn, S., Errett, J., Lin, T.-Y., Schneller, S.,  
626 Zust, R., Dong, H., Thiel, V., Sen, G. C., Fensterl, V., Klimstra, W. B., Pierson, T. C.,  
627 Buller, R. M., Gale, M., Jr, Shi, P.-Y., and Diamond, M. S. (2010) 2'-O methylation of the  
628 viral mRNA cap evades host restriction by IFIT family members. *Nature*. **468**, 452–456
- 629 25. Zust, R., Cervantes-Barragan, L., Habjan, M., Maier, R., Neuman, B. W., Ziebuhr, J.,  
630 Szretter, K. J., Baker, S. C., Barchet, W., Diamond, M. S., Siddell, S. G., Ludewig, B., and  
631 Thiel, V. (2011) Ribose 2'-O-methylation provides a molecular signature for the  
632 distinction of self and non-self mRNA dependent on the RNA sensor Mda5. *Nat Immunol*.  
633 **12**, 137–143
- 634 26. Diamond, M. S. (2014) IFIT1: A dual sensor and effector molecule that detects non-2'-O  
635 methylated viral RNA and inhibits its translation. *Cytokine Growth Factor Rev*.  
636 10.1016/j.cytogfr.2014.05.002
- 637 27. Fensterl, V., and Sen, G. C. (2011) The ISG56/IFIT1 gene family. *Journal of Interferon &*  
638 *Cytokine Research*. **31**, 71–78
- 639 28. Schuck, P., and Balbo, A. (2005) Analytical Ultracentrifugation in the Study of Protein  
640 Self- association and Heterogeneous Protein-Protein Interactions. *Cold Spring Harbor*  
641 *Laboratory Press*
- 642 29. Krissinel, E., and Henrick, K. (2007) Inference of Macromolecular Assemblies from  
643 Crystalline State. *J Mol Biol*. **372**, 774–797
- 644 30. Novac, O., Guenier, A. S., and Pelletier, J. (2004) Inhibitors of protein synthesis identified  
645 by a high throughput multiplexed translation screen. *Nucleic Acids Res*. **32**, 902–915
- 646 31. Diamond, M. S., and Farzan, M. (2013) The broad-spectrum antiviral functions of IFIT  
647 and IFITM proteins. *Nat Rev Immunol*. **13**, 46–57
- 648 32. Pichlmair, A., Schulz, O., Tan, C. P., Rehwinkel, J., Kato, H., Takeuchi, O., Akira, S.,  
649 Way, M., Schiavo, G., and Reis e Sousa, C. (2009) Activation of MDA5 Requires Higher-  
650 Order RNA Structures Generated during Virus Infection. *J Virol*. **83**, 10761–10769
- 651 33. Zeytuni, N., Ozyamak, E., Ben-Harush, K., Davidov, G., Levin, M., Gat, Y., Moyal, T.,  
652 Brik, A., Komeili, A., and Zarivach, R. (2011) Self-recognition mechanism of MamA, a  
653 magnetosome-associated TPR-containing protein, promotes complex assembly.  
654 *Proceedings of the National Academy of Sciences*. **108**, E480–7
- 655 34. Zhang, Z., Chang, L., Yang, J., Conin, N., Kulkarni, K., and Barford, D. (2013) The Four  
656 Canonical TPR Subunits of Human APC/C Form Related Homo-Dimeric Structures and  
657 Stack in Parallel to Form a TPR Suprahelix. *J Mol Biol*. **425**, 4236–4248
- 658 35. Krachler, A. M., Sharma, A., and Kleanthous, C. (2010) Self-association of TPR domains:  
659 Lessons learned from a designed, consensus-based TPR oligomer. *Proteins*.  
660 10.1002/prot.22726
- 661 36. Kajander, T., Cortajarena, A. L., Mochrie, S., and Regan, L. (2007) Structure and stability  
662 of designed TPR protein superhelices: unusual crystal packing and implications for natural  
663 TPR proteins. *Acta Crystallogr D Biol Crystallogr*. **63**, 800–811
- 664 37. Conte, Lo, L., Chothia, C., and Janin, J. (1999) The atomic structure of protein-protein  
665 recognition sites. *J Mol Biol*. **285**, 2177–2198

crystal structures of RNA-bound human IFIT1 dimers

- 666 38. Gaudreault, M., Gingras, M.-E., Lessard, M., Leclerc, S., and Gu erin, S. L. (2009)  
667 Electrophoretic Mobility Shift Assays for the Analysis of DNA-Protein Interactions. in  
668 *Nucleic Acid Crystallography* (Ennifar, E. ed), pp. 15–35, Methods in Molecular  
669 Biology™, Humana Press, Totowa, NJ, **543**, 15–35
- 670 39. Fried, M. G., and Liu, G. (1994) Molecular sequestration stabilizes CAP–DNA complexes  
671 during polyacrylamide gel electrophoresis. *Nucleic Acids Res.* **22**, 5054–5059
- 672 40. Mossessova, E., and Lima, C. D. (2000) Ulp1-SUMO crystal structure and genetic  
673 analysis reveal conserved interactions and a regulatory element essential for cell growth in  
674 yeast. *Mol Cell.* **5**, 865–876
- 675 41. Grochulski, P., Fodje, M. N., Gorin, J., Labiuk, S. L., Berg, R., IUCr (2011) Beamline  
676 08ID-1, the prime beamline of the Canadian Macromolecular Crystallography Facility. *J*  
677 *Synchrotron Radiat.* **18**, 681–684
- 678 42. Winn, M. D., Ballard, C. C., Cowtan, K. D., Dodson, E. J., Emsley, P., Evans, P. R.,  
679 Keegan, R. M., Krissinel, E. B., Leslie, A. G. W., McCoy, A., McNicholas, S. J.,  
680 Murshudov, G. N., Pannu, N. S., Potterton, E. A., Powell, H. R., Read, R. J., Vagin, A.,  
681 Wilson, K. S., IUCr (2011) Overview of the CCP4 suite and current developments. *Acta*  
682 *Crystallogr D Biol Crystallogr.* **67**, 235–242
- 683 43. McCoy, A. J., Grosse-Kunstleve, R. W., Adams, P. D., Winn, M. D., Storoni, L. C., Read,  
684 R. J., IUCr (2007) Phaser crystallographic software. *J Appl Crystallogr.* **40**, 658–674
- 685 44. Moriarty, N. W., Grosse-Kunstleve, R. W., and Adams, P. D. (2009) electronic Ligand  
686 Builder and Optimization Workbench (eLBOW): a tool for ligand coordinate and restraint  
687 generation. *Acta Crystallogr D Biol Crystallogr.* **65**, 1074–1080
- 688 45. Adams, P. D., Afonine, P. V., Bunk oczi, G., Chen, V. B., Davis, I. W., Echols, N., Headd,  
689 J. J., Hung, L.-W., Kapral, G. J., Grosse-Kunstleve, R. W., McCoy, A. J., Moriarty, N. W.,  
690 Oeffner, R., Read, R. J., Richardson, D. C., Richardson, J. S., Terwilliger, T. C., and  
691 Zwart, P. H. (2010) PHENIX: a comprehensive Python-based system for macromolecular  
692 structure solution. *Acta Crystallogr D Biol Crystallogr.* **66**, 213–221
- 693 46. Emsley, P., Lohkamp, B., Scott, W. G., and Cowtan, K. (2010) Features and development  
694 of Coot. *Acta Crystallogr D Biol Crystallogr.* **66**, 486–501
- 695 47. Chen, V. B., Arendall, W. B., Headd, J. J., Keedy, D. A., Immormino, R. M., Kapral, G.  
696 J., Murray, L. W., Richardson, J. S., Richardson, D. C., IUCr (2010) MolProbity: all-atom  
697 structure validation for macromolecular crystallography. *Acta Crystallogr D Biol*  
698 *Crystallogr.* **66**, 12–21
- 699 48. Baker, N. A., Sept, D., Joseph, S., Holst, M. J., and McCammon, J. A. (2001)  
700 Electrostatics of nanosystems: Application to microtubules and the ribosome. *Proceedings*  
701 *of the National Academy of Sciences.* **98**, 10037–10041
- 702 49. Robert, X., and Gouet, P. (2014) Deciphering key features in protein structures with the  
703 new ENDscript server. *Nucleic Acids Res.* **42**, W320–4
- 704 50. Schneider, T. D., and Stephens, R. M. (2004) Sequence logos: a new way to display  
705 consensus sequences. *Nucleic Acids Res.* **18**, 1–4

## crystal structures of RNA-bound human IFIT1 dimers

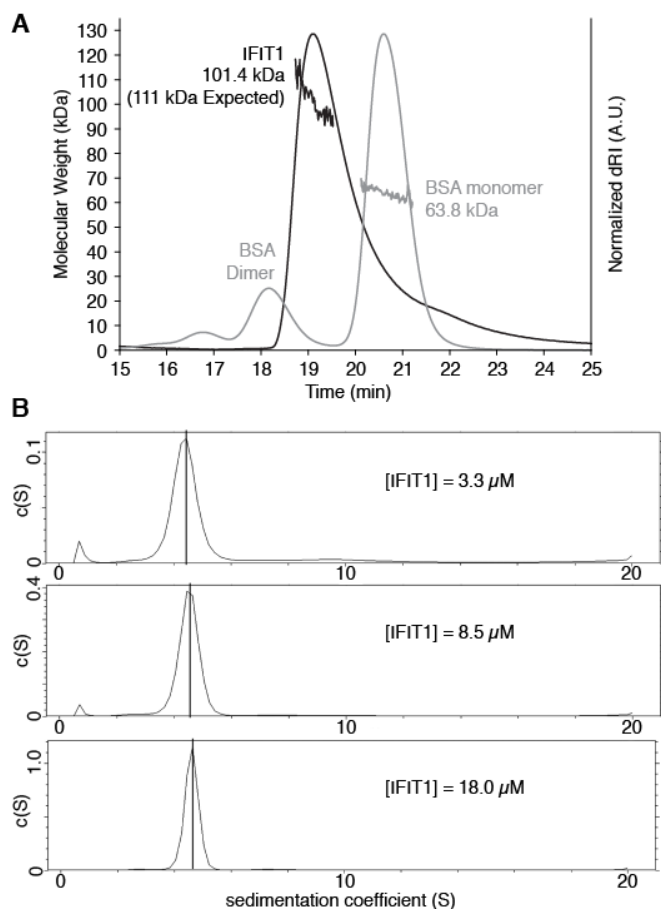

**Figure 1. Human IFIT1 forms dimers in solution.**

**(A)** SEC-MALS of human IFIT1 injected at 10 mg/ml on a Superdex 200 Increase 10/300 column. Shown are the estimated molecular weight and normalized differential refractive index (dRI) as a function of time. BSA (10.5 mg/ml) was performed as a control. **(B)** Sedimentation velocity analytical ultracentrifugation of IFIT1. Sedimentation data were collected at 16 °C and analyzed using SEDFIT. Upper panel: c(S) distribution of IFIT1 at 3.3  $\mu$ M; middle panel: c(S) distribution of IFIT1 at 8.5  $\mu$ M; lower panel: c(S) distribution of IFIT1 at 18.0  $\mu$ M. Vertical lines in peaks correspond to untransformed sedimentation coefficients (4.40 S at 3.3  $\mu$ M, 4.52 S at 8.5  $\mu$ M, and 4.61 S at 18.0  $\mu$ M) calculated by peak integration of c(S) distribution using SEDFIT. Sedimentation coefficients transformed to  $S_{20,W}$  values can be found in **Table S1**.

## crystal structures of RNA-bound human IFIT1 dimers

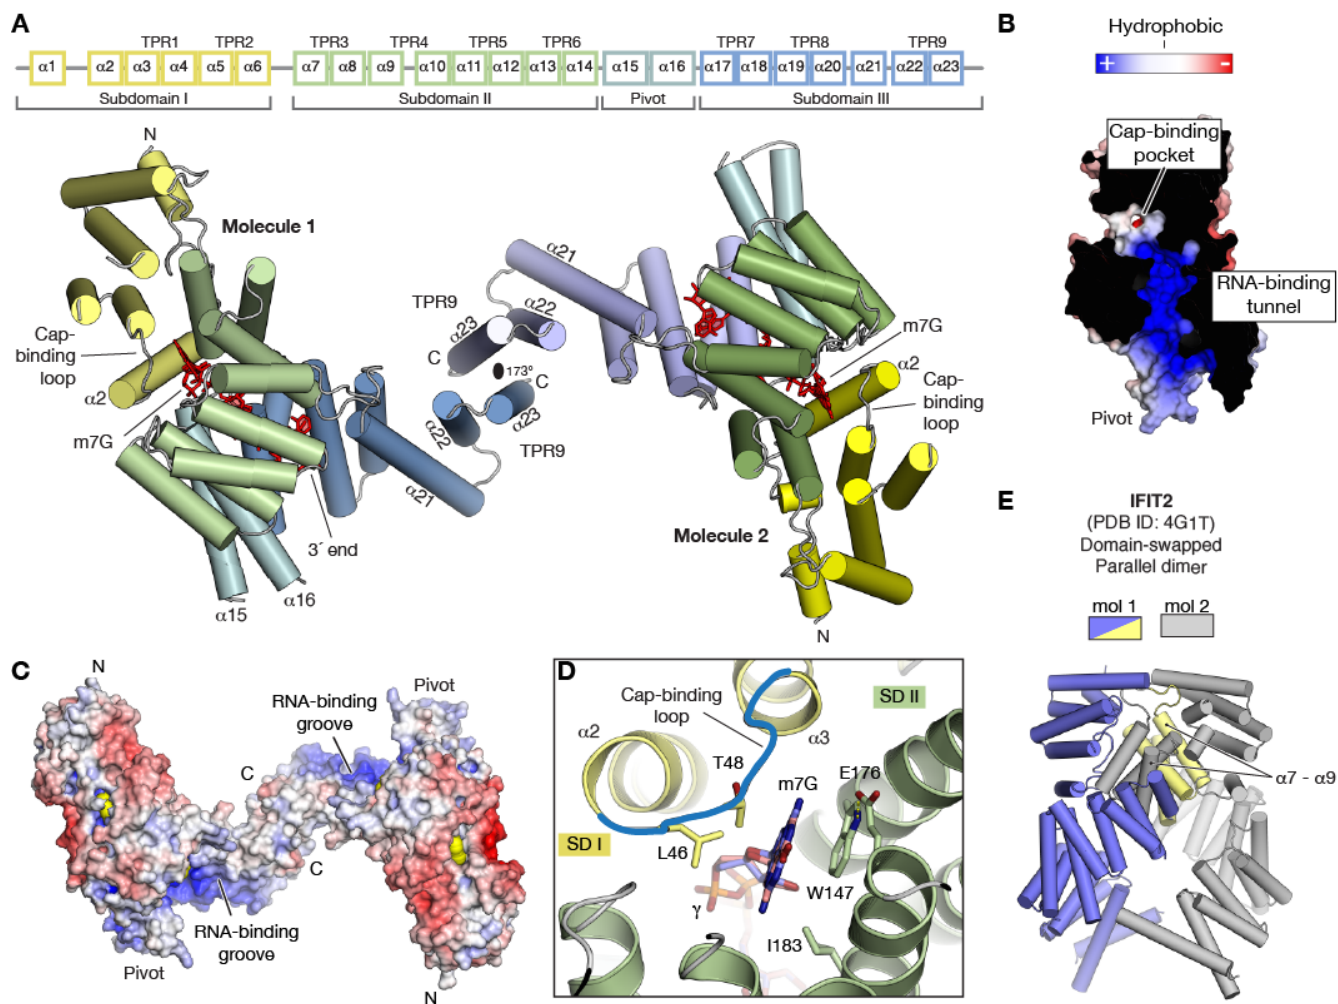

**Figure 2. Overall structure of RNA-bound human IFIT1 dimer.**

(A) Schematic of human IFIT1 subdomains and cartoon representation of the overall structure colored by subdomain. (B) Cross section of the IFIT1 RNA-binding tunnel and (C) IFIT1 dimers colored by surface electrostatic potential from negative ( $-10 \text{ kTe}^{-1}$ ; red) to positive ( $+10 \text{ kTe}^{-1}$ ; blue). The 3' end of the RNA exits from the RNA-binding tunnel and points towards an RNA-binding groove at the C-terminus of each molecule. (D) Close-up of the cap-binding pocket with m7G interacting residues represented as sticks and colored according to subdomain. (E) In IFIT2, dimerization is through domain-swapping by exchanging helices  $\alpha 7$ - $\alpha 9$  (pale yellow and grey) from subdomain II between the two molecules.

### crystal structures of RNA-bound human IFIT1 dimers

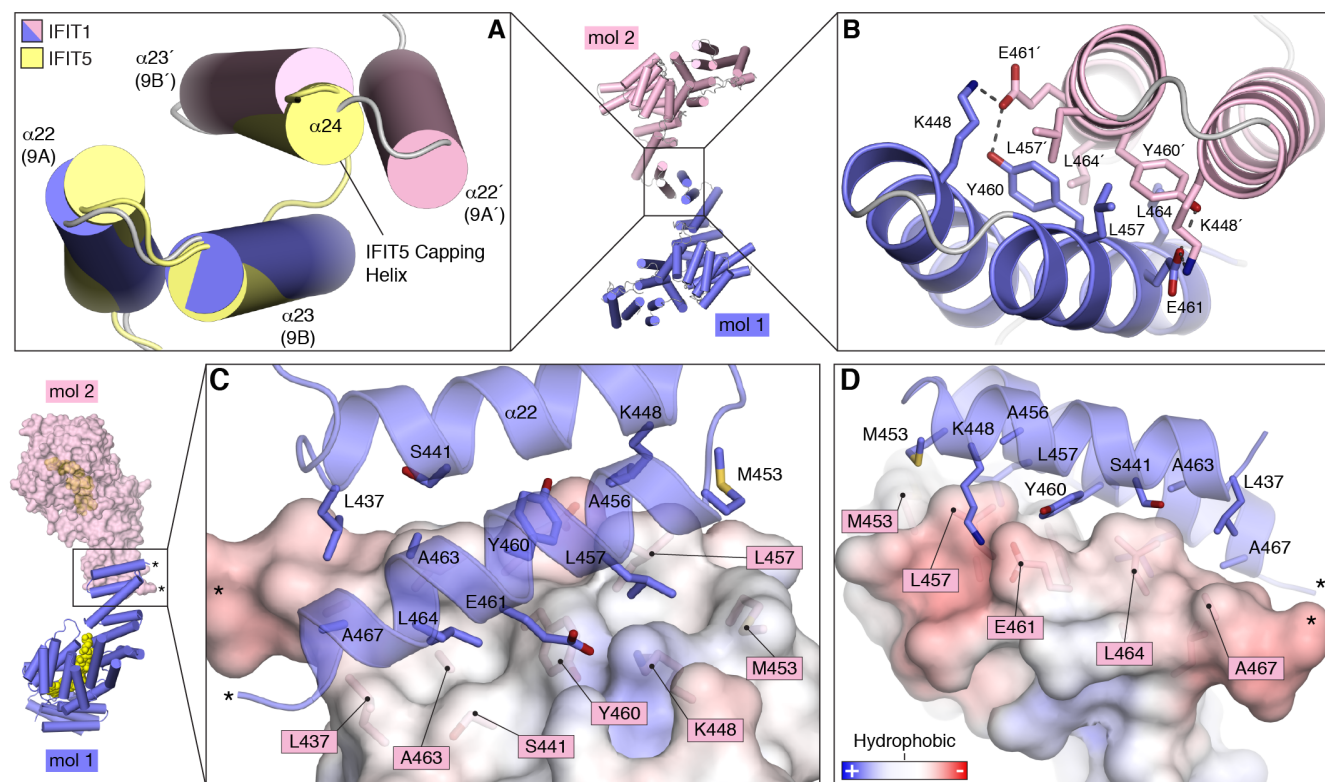

**Figure 3. Structural basis for IFIT1 dimerization.**

(A) Close-up of TPR9 (helices 9A and 9B) from human IFIT1 with IFIT5 superposed. Compared to IFIT5, IFIT1 proteins are truncated and lack helix  $\alpha 24$ , which in IFIT5 functions as a C-terminal capping helix. The two protomers are referred to as IFIT1 (blue) and IFIT1' (light pink). (B) Cartoon/stick representation of the critical residues at the IFIT1 dimerization interface in the same orientation as (A). These residues make up most of the buried surface area between the dimers, and were targeted in the mutational analysis. (C and D) Two orthogonal views showing cartoon representation of IFIT1 molecule 1 (blue) and surface representation of IFIT1 molecule 2 colored according to electrostatic potential from  $-10 \text{ kTe}^{-1}$  (red) to  $+10 \text{ kTe}^{-1}$  (blue). Residues at the interface are shown as sticks. The C-terminus of each molecule is indicated by asterisks for reference.

## crystal structures of RNA-bound human IFIT1 dimers

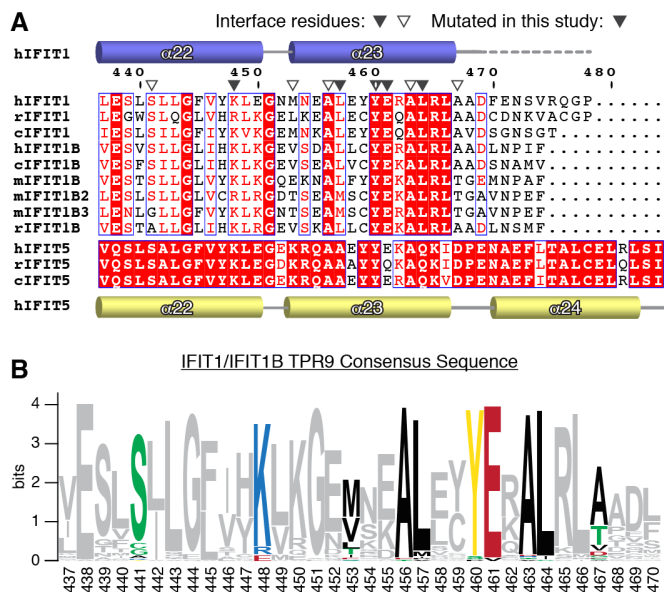

**Figure 4. The IFIT1 dimerization interface is conserved in IFIT1 and IFIT1B proteins.**

(A) TPR9 Sequence alignment of select IFIT1, IFIT1B and IFIT5 residues from human, mouse, cat, and rabbit. Secondary structure of IFIT1 and IFIT5 are depicted above and below. The ruler corresponds to human IFIT1 residue numbers. Compared to IFIT1 proteins, IFIT5 proteins are extended and have an additional  $\alpha$ -helix ( $\alpha$ 24). (B) WebLogo sequence consensus of 86 IFIT1 and IFIT1B genes showing only TPR9. Interface residues are colored according to property, and other residues are in gray. The dimerization interface residues are highly conserved.

crystal structures of RNA-bound human IFIT1 dimers

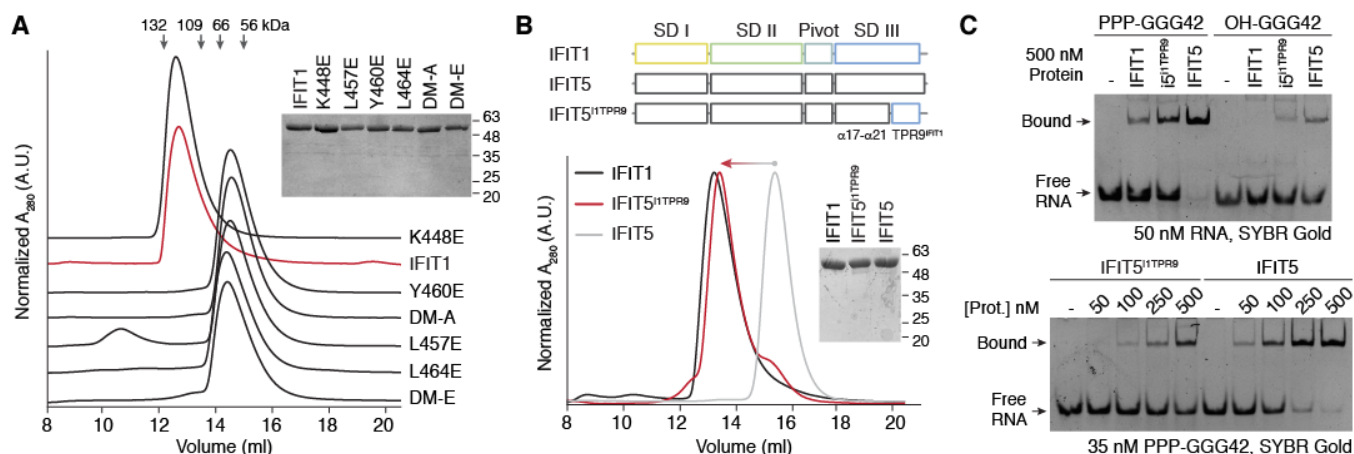

**Figure 5. Mutational analysis of IFIT1 dimerization.**

(A) Gel filtration (Superdex 200 Increase 10/300) analysis of IFIT1 mutants (at 2 mg/ml each) with SDS-PAGE of the input proteins (1  $\mu$ g per lane). Each UV trace was offset along the y-axis for clarity. The peak maximum of IFIT1 wt was arbitrarily set to 1, and each trace shows the peak height relative to IFIT1. The bars above correspond to the migration of BSA dimer (132 kDa), IFIT2 dimer (109 kDa), BSA monomer (66 kDa), and IFIT5 monomer (56 kDa). (B) Schematic of the IFIT5-IFIT1 chimera (IFIT5<sup>i1TPR9</sup>), and gel filtration (Superdex 200 Increase 10/300) analysis of the indicated proteins (at 2 mg/ml each) with SDS-PAGE of the input proteins (2  $\mu$ g per lane). The chimera behaves as a dimer on gel filtration similar to IFIT1. (C) SYBR Gold stained electromobility gel-shift assays between a 42-nucleotide PPP-RNA (GGG42) and the indicated proteins. OH-RNA was utilized as a negative control for non-specific RNA binding in the upper panel.

## crystal structures of RNA-bound human IFIT1 dimers

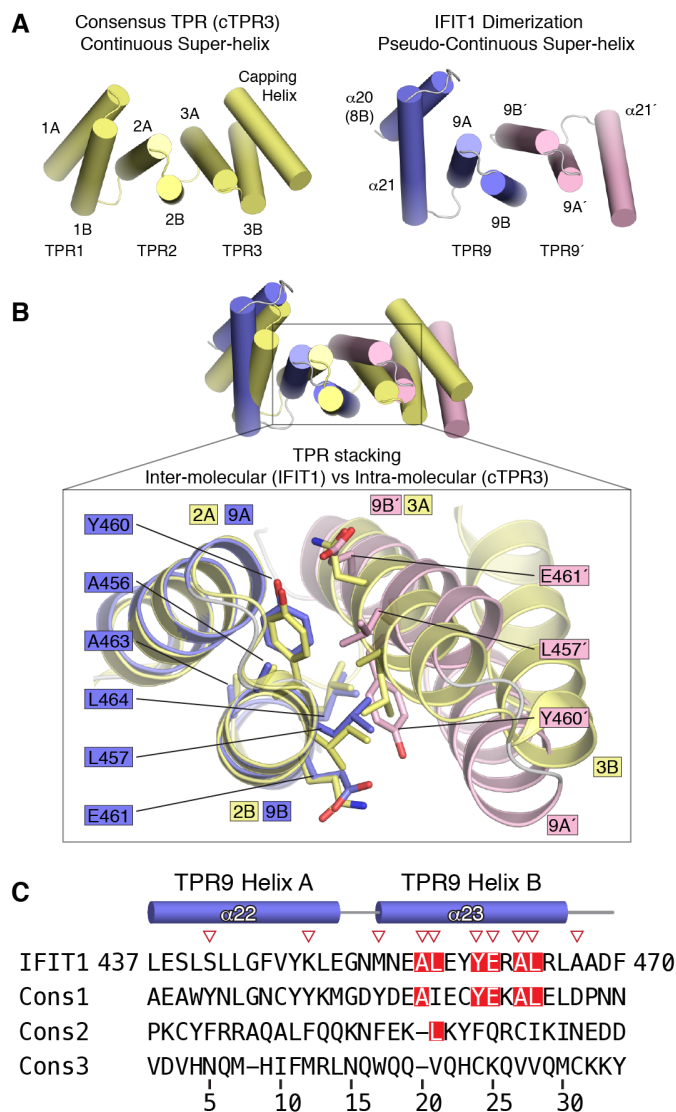

**Figure 6. IFIT1 forms a pseudo-continuous TPR super-helix that mediates dimerization.**

(A) Left, structure of cTPR3 (PDB ID: 1NA0) made up of 3 consensus repeats, and Right, the central region from the IFIT1 dimer colored according to the molecule each helix originates from. Together, the C-terminal helices from each IFIT1 molecule associate in a manner that resembles a continuous TPR array. (B) Superposition of cTPR3 over the IFIT1 dimerization helices and close-up of residues involved in IFIT1 inter-molecular TPR stacking vs cTPR3 intra-molecular TPR stacking. (C) Comparison of IFIT1 TPR9 to consensus TPR sequences, which represent the top 3 residue preferences for each position of the 34 amino acid TPR motif. The consensus sequences were adapted from ref. (4).



## crystal structures of RNA-bound human IFIT1 dimers

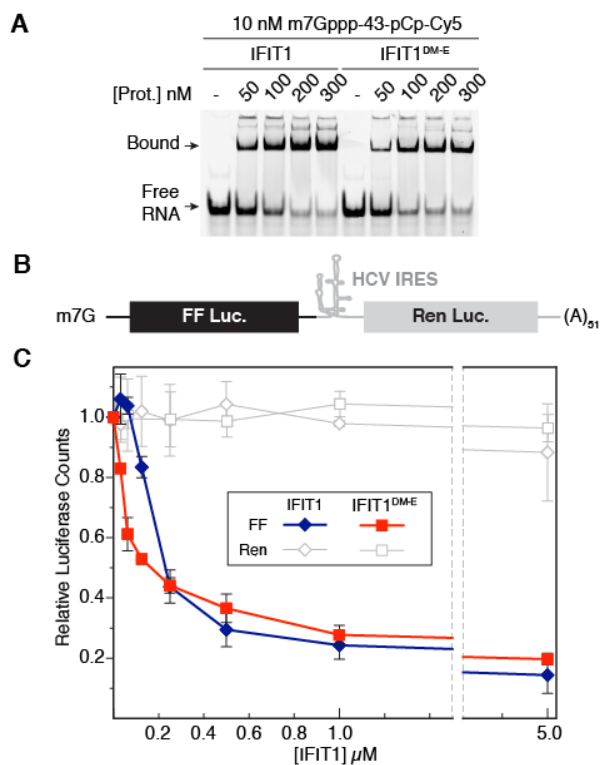

**Figure 7. Functional analysis of IFIT1 dimerization.**

(A) Gel shift between wt IFIT1 or monomeric IFIT1<sup>DM-E</sup> and a 43-nucleotide, capped-RNA which is fluorescently labelled with pCp-Cy5 at the 3' end. (B) Schematic of bicistronic mRNA reporter utilized in the translation assay. (C) Comparison of translational inhibition by IFIT1 or IFIT1<sup>DM-E</sup>. Both proteins reduce cap-dependent FF translation equally without affecting cap-independent Ren translation. Data are represented as the mean of 2 independent measurements performed in duplicate  $\pm$  standard deviation.

## crystal structures of RNA-bound human IFIT1 dimers

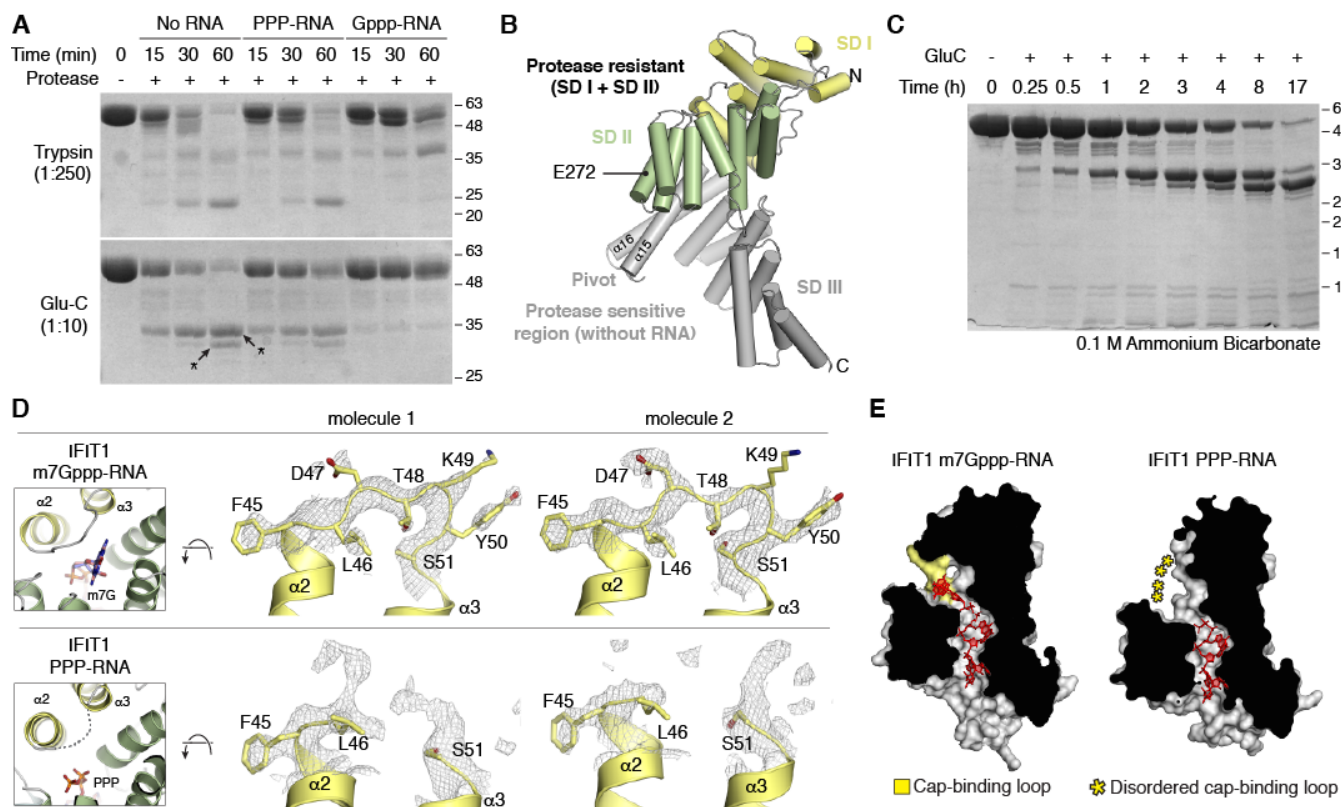

**Figure 8. Limited protease digestion of IFIT1 and conformational changes associated with RNA binding.**

(A) IFIT1, IFIT1 with PPP-oligoA, and IFIT1 with Gppp-oligoA were subjected to limited protease digestion for the indicated times. Top, 1:250 (w/w) IFIT1:trypsin and Bottom, 1:10 (w/w) IFIT1:Endoproteinase Glu-C. In this assay, Gppp-RNA was used instead of m7Gppp-RNA since it has been shown to bind similarly (6). The two indicated bands were excised and analyzed by in-gel tryptic digestion and LC/MS/MS to map the in-solution Glu-C cleavage sites. (B) Location of Glu 272 on subdomain II, where Glu-C cleaves IFIT1 to produce the 32 kDa bottom fragment. (C) Extended time course of Glu-C proteolysis in 0.1M Ammonium Bicarbonate pH 7.8 with 1:10 protease:protein. (D) Simulated annealing  $2F_o - F_c$  omit map of IFIT1 residues 45-51. The cap-binding loop is more ordered in the m7Gppp-RNA bound structure compared to the PPP-RNA bound structure. (E) Cross-section of the IFIT1 RNA-binding tunnel (grey protein surface with RNA depicted as red sticks). The cap-binding pocket is an open state in the absence of an m7G moiety.
